# Supplementary material for: Heavy Metal Pollution and Source Contributions in Agricultural Soils Developed from Karst Landform in the Southwestern Region of China
Source: MDPI journal article supplement (doi:10.3390/toxics10100568), 2022-09-27
Supplement: s1 [file s1]

# Heavy Metal Pollution and Source Contributions in Agricultural Soils Developed from Karst Landform in the Southwestern Region of China

Yuanli Qin, Fugui Zhang, Shandong Xue, Tao Ma and Linsong Yu

**Table S1.** Analytical methods and detection limits.

| Indicator        | Analytical Methods  | Detection Limits | Unit     |
|------------------|---------------------|------------------|----------|
| As               | AFS <sup>a</sup>    | 0.2              | mg/kg    |
| Cd               | ICP-MS <sup>b</sup> | 0.02             | mg/kg    |
| Cr               | XRF <sup>c</sup>    | 1.5              | mg/kg    |
| Cu               | XRF <sup>c</sup>    | 0.1              | mg/kg    |
| Hg               | CV-AFS <sup>d</sup> | 0.0005           | mg/kg    |
| Ni               | XRF <sup>c</sup>    | 0.2              | mg/kg    |
| Pb               | XRF <sup>c</sup>    | 0.2              | mg/kg    |
| Zn               | XRF <sup>c</sup>    | 1                | mg/kg    |
| Mn               | XRF <sup>c</sup>    | 5                | mg/kg    |
| K <sub>2</sub> O | XRF                 | 1                | %        |
| SOC              | POT <sup>e</sup>    | 0.1              | %        |
| pH               | ISE <sup>f</sup>    | 0.1              | unitless |

a: Atomic fluorescence spectrometry;

b: Inductively coupled plasma-Mass spectrometry;

c: X-ray fluorescence spectrometry;

d: Cold vapor-Atomic fluorescence spectrometry;

e: Potentiometric method;

f: Ion selective electrode.

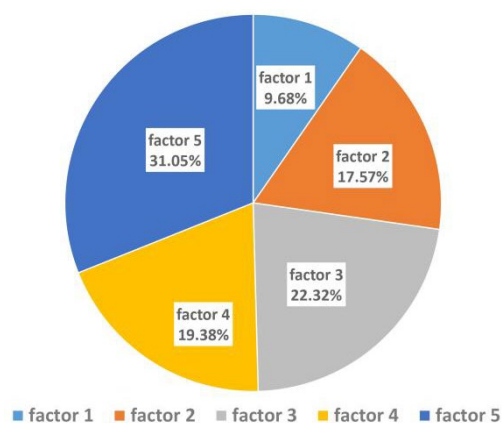

**Figure S1.** Total contribution rate of different sources calculated by PMF.
